# Supplementary material for: Trial evaluating the efficacy and safety of aprepitant, palonosetron and dexamethasone antiemetic therapy (APDATE) for germ cell tumors: results of a single-arm study.
Source: Research Square preprint supplement (doi:10.21203/rs.3.rs-1715703/v1), 2022-06-16
Supplement: Supplementary file 1 [file 73f736b2211fd64f5322d300.xlsx]

## Sheet: Sheet1
		Table 1: Patients’ characteristics at baseline (n=19)			Table 2: The event of CINV			Table 3: Adverse events						Table 4: Previous and present studies about antiemetic therapy for BEP chemotherapy
		Age (years), median (range)	37 (22-53)		Nausea CTCAE Grade, n (%)				Overall	G1	G2	G3-5			Study design		Antiemetic drugs	N	Oveall CRR (%)	Acute CRR (%)	Delay CRR (%)
		Disease, n (%)			Overall	16 (84.2%)		Constipation	11 (57.9%)	7 (36.8%)	4 (21.1%)	0 (0.0%)		Einhorn et al. 2007	Prospective	Single arm	Pal 0.25mg (day 1, 3 and 5)	41	N.A.	34	61
		Testicular cancer	18 (94.7%)		G1	6 (31.6%)		Hiccups	6 (31.6%)	2 (10.5%)	4 (21.1%)	0 (0.0%)					DEX
		Extragonadal germ cell tumor	1 (5.3%)		G2	7 (36.8%)		Diarrhea	3 (15.8%)	3 (15.8%)	0 (0.0%)	0 (0.0%)		Albany et al. 2012	Prospective	RCT	Ap vs Pla	35 vs 34	42 vs 13	55 vs 38	72 vs 52
		IGCCC, n (%)			G3	3 (15.8%)		Hypertension	1 (5.3%)	0 (0.0%)	1 (5.3%)	0 (0.0%)					5HT3-RA (except for Pal) , DEX
		Good prognosis	14 (73.7%)		Vomiting CTCAE Grade, n (%)			Headache	1 (5.3%)	1 (5.3%)	0 (0.0%)	0 (0.0%)		Olver et al. 2013	Prospective	Single arm	Gra or Tro	50	41	(78 (only day1))	N.A.
		Intermediate prognosis	5 (26.3%)		G1	4 (21.1%)		G; Grade									Ap, DEX
		Alcohol consumption, n (%)			Using rescue therapy	9 (47.4%)								Hamada et al 2014	Retrospective	Single arm	Pal 0.75mg	30	90	90	93
		Present	11 (57.9%)		G; Grade												Ap, DEX
		None	6 (31.6%)											Adra et al 2016	Prospective	Single arm	Ond or Pal 0.25mg (day 1, 3 and 5)	64	24.1	29.6	46.3
		Unknown	2 (10.5%)														FosAp, DEX
		Smoking history, n (%)												Shimura et al 2019	Retrospective	Case control	Pal 0.75mg (day 1and 5) vs Gra	9 vs 9	50 vs 0	56 vs 0	53 vs 0
		Smoking	12 (76.4%)														Ap, DEX
		Exsmoker	2 (15.0%)											Present study	Prospective	Single arm	Pal 0.75mg (day 1 and 5)	22	47.4	68.4	52.6
		None	5 (8.6%)														Ap, DEX
		IGCCC; International germ cell carcinoma criteria												Pal: palonosetron, DEX: dexamethasone, Ap: aprepitant, Pla: placebo, Gra: granisetron, Tro: tropisetron,
														Ond: ondansetron, FosAp: fosaprepitant
